# Supplementary material
Source: PubMed Central journal article supplement (PMC8210848)

**Supplemental Figure 1.** Junctional changes in case 19. Atypical melanocytes are disposed as single cells and as irregular nests along the basal layer of the esophageal epithelium.

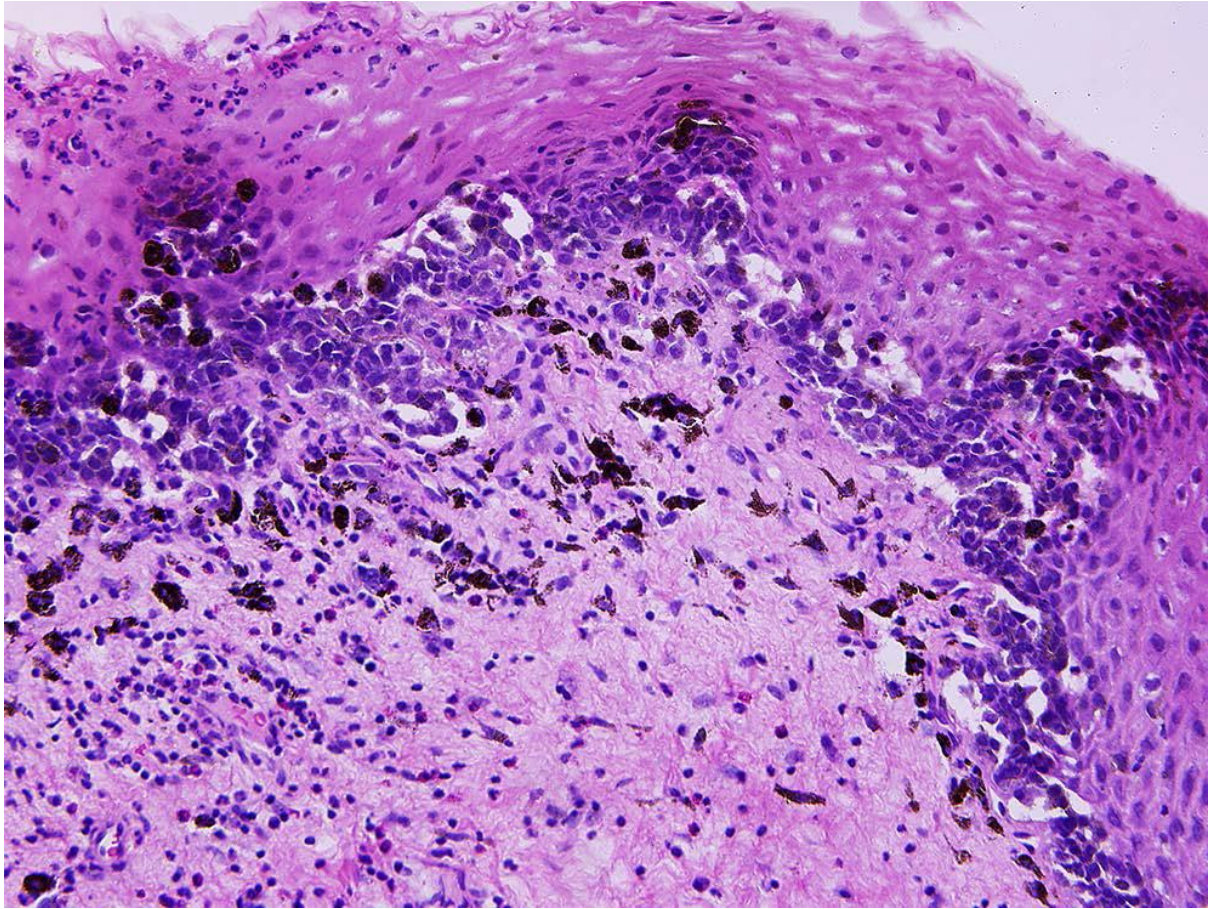

Supplement: NIHMS1703694-supplement-Supple_fig.pdf [file NIHMS1703694-supplement-Supple_fig.pdf]
